# Supplementary material
Source: PubMed Central journal article supplement (PMC2776996)
Supplement: 00166.2009_1.pdf [file 00166.2009_1.pdf]

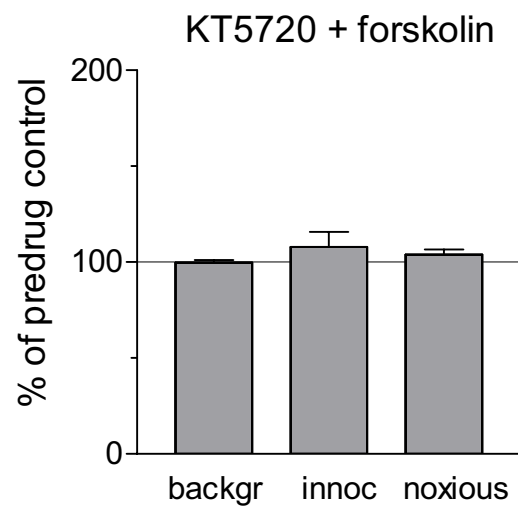

## Supplementary Figure 1

**PKA inhibition blocks forskolin effects.** In the presence of a PKA inhibitor (KT5720, 100  $\mu$ M) forskolin (1 mM) had no effect on background activity and on the responses of CeLC neurons ( $n = 4$ ) to innocuous (500 g/30 mm<sup>2</sup>) and noxious (2000 g/30 mm<sup>2</sup>) stimulation of the knee. Both drugs were co-administered into the left ( $n = 2$ ) or right ( $n = 2$ ) CeLC. Data were pooled because no difference was found. Bar histograms show averaged values (mean  $\pm$  SE) during drug administration normalized to predrug control values (in ACSF, set to 100 % as indicated by the dashed line).
